# Supplementary material
Source: ML conference proceedings conference paper supplement (https://proceedings.mlr.press/v84/rowland18a.html)
Supplement: Supplementary file [file rowland18a-supp.pdf]

## Appendix

### 7 A supporting result

We first present an alternative characterisation of the projection operator  $\Pi_C$  which will be useful for the analysis that follows. Throughout, for a probability measure  $\nu \in \mathcal{P}(\mathbb{R})$ , we write  $F_\nu$  for its CDF.

**Proposition 6.** *For each  $i = 1, \dots, K$ , define  $h_{z_i} : \mathbb{R} \rightarrow [0, 1]$  to be the (possibly asymmetric) hat function centered in  $z_i$  defined by*

$$h_{z_i}(x) = \begin{cases} \frac{z_{i+1}-x}{z_{i+1}-z_i} & \text{for } x \in [z_i, z_{i+1}] & \text{and } 1 \leq i < K, \\ \frac{x-z_{i-1}}{z_i-z_{i-1}} & \text{for } x \in [z_{i-1}, z_i] & \text{and } 1 < i \leq K, \\ 1 & \text{for } x \leq z_1 & \text{and } i = 1, \\ 1 & \text{for } x \geq z_K & \text{and } i = K, \\ 0 & \text{otherwise.} \end{cases}$$

Then defining  $\Pi_C \nu = \sum_{i=1}^K \mathbb{E}_{w \sim \nu} [h_{z_i}(w)] \delta_{z_i}$  for all probability distributions  $\nu \in \mathcal{P}(\mathbb{R})$ , is consistent with the earlier definition in (7) for mixtures of Diracs. Further,  $F_{\Pi_C \nu}(z_i)$  is equal to the average value of  $F_\nu$  in the interval  $[z_i, z_{i+1}]$ , for  $i = 1, \dots, K-1$ , and  $F_{\Pi_C \nu}(z_K) = 1$ .

*Proof.* The consistency of the definition  $\Pi_C \nu = \sum_{i=1}^K \mathbb{E}_{w \sim \nu} [h_{z_i}(w)] \delta_{z_i}$  with (7) follows immediately by observing directly that the definitions agree when  $\nu$  is a Dirac measure, and then observing that the definition of  $\Pi_C$  in the statement of the proposition is also affine.

For the characterisation of  $F_{\Pi_C \nu}(z_i)$  for  $i = 1, \dots, K-1$ , we note that

$$\begin{aligned} F_{\Pi_C \nu}(z_i) &= \sum_{j=1}^i \mathbb{E}_{w \sim \nu} [h_{z_j}(w)] \\ &= \mathbb{E}_{w \sim \nu} \left[ \sum_{j=1}^i h_{z_j}(w) \right] \\ &= \mathbb{E}_{w \sim \nu} \left[ \mathbb{1}_{w \leq z_i} + \mathbb{1}_{w \in (z_i, z_{i+1}]} \frac{z_{i+1} - w}{z_{i+1} - z_i} \right] \\ &= \frac{1}{z_{i+1} - z_i} \int_{z_i}^{z_{i+1}} F_\nu(w) dw, \end{aligned}$$

as required. Finally, since  $\Pi_C \nu$  is supported on  $\{z_1, \dots, z_K\}$ , it immediately follows that  $F_{\Pi_C \nu}(z_K) = 1$ .  $\square$

### 8 Mixture update version of categorical policy evaluation and categorical Q-learning

Here we give a precise specification of the mixture update versions of categorical policy evaluation and categorical Q-learning, as described in the main paper in Section 4.3. The difference from Algorithm 1 is highlighted in red.

---

**Algorithm 2** CDRL mixture update
 

---

**Require:**  $\eta_t^{(x,a)} = \sum_{k=1}^K p_{t,k}^{(x,a)} \delta_{z_k}$  for each  $(x, a)$

- 1: Sample transition  $(x_t, a_t, r_t, x_{t+1})$
  - 2: # Compute distributional Bellman target
  - 3: **if** Categorical policy evaluation **then**
  - 4:  $a^* \sim \pi(\cdot | x_{t+1})$
  - 5: **else if** Categorical Q-learning **then**
  - 6:  $a^* \leftarrow \arg \max_a \mathbb{E}_{R \sim \eta_t^{(x_{t+1}, a)}} [R]$
  - 7: **end if**
  - 8:  $\hat{\eta}_*^{(x_t, a_t)} \leftarrow (f_{r_t, \gamma}) \# \eta_t^{(x_{t+1}, a^*)}$
  - 9: # Project target onto support
  - 10:  $\hat{\eta}_t^{(x_t, a_t)} \leftarrow \Pi_C \hat{\eta}_*^{(x_t, a_t)}$
  - 11: # Compute mixture update
  - 12: **Generate new estimates according to mixture rule:**  $\eta_{t+1}^{(x_t, a_t)} = (1 - \alpha_t(x_t, a_t)) \eta_t^{(x_t, a_t)} + \alpha_t(x_t, a_t) \hat{\eta}_t^{(x_t, a_t)}$
  - 13: **return**  $\eta_{t+1}$
- 

## 9 Proof of results in Section 4

**Lemma 2.** *The operator  $\Pi_C \mathcal{T}^\pi$  is in general not a contraction in  $\bar{d}_p$ , for  $p > 1$ .*

*Proof.* We exhibit a simple counterexample; it is enough to demonstrate that  $\Pi_C$  can act as an expansion. Take  $z_1 = 0, z_2 = 1$ , and consider two Dirac delta distributions,  $\nu_1 = \delta_{1/4}$  and  $\nu_2 = \delta_{3/4}$ . We have  $d_p(\nu_1, \nu_2) = ((1/2)^p)^{1/p} = 1/2$ . Now  $\Pi_C \nu_1 = \frac{3}{4} \delta_0 + \frac{1}{4} \delta_1$ , and  $\Pi_C \nu_2 = \frac{1}{4} \delta_0 + \frac{3}{4} \delta_1$ , and hence  $d_p(\Pi_C \nu_1, \Pi_C \nu_2) = ((1/2) \times 1^p)^{1/p} = 2^{-1/p} > 1/2$ .  $\square$

**Proposition 1.** *The Cramér metric  $\ell_2$  endows a particular subset of  $\mathcal{P}(\mathbb{R})$  with a notion of orthogonal projection, and the orthogonal projection onto the subset  $\mathcal{P}$  is exactly the heuristic projection  $\Pi_C$ . Consequently,  $\Pi_C$  is a non-expansion with respect to  $\ell_2$ .*

*Proof.* We begin by setting out a Hilbert space structure of a subset of  $\mathcal{P}(\mathbb{R})$ . Let  $\mathcal{M}(\mathbb{R})$  be the vector space of all finite signed measures on  $\mathbb{R}$ . First, observe that the following subspace of signed measures:

$$\mathcal{M}_0(\mathbb{R}) = \left\{ \nu \in \mathcal{M}(\mathbb{R}) \mid \nu(\mathbb{R}) = 0, \int_{\mathbb{R}} F_\nu(x)^2 dx < \infty \right\},$$

where  $F_\nu(x) = \nu((-\infty, x])$  for each  $x \in \mathbb{R}$ , is isometrically isomorphic to a subspace of the Hilbert space  $L^2(\mathbb{R})$  with inner product given by

$$\langle \nu_1, \nu_2 \rangle_{\ell_2} = \int_{\mathbb{R}} F_{\nu_1}(x) F_{\nu_2}(x) dx. \quad (10)$$

Now consider the affine space  $\delta_0 + \mathcal{M}_0(\mathbb{R})$  (i.e. the translation of  $\mathcal{M}_0(\mathbb{R})$  in  $\mathcal{M}(\mathbb{R})$  by the measure  $\delta_0$ ). This affine space consists of signed measures of total mass 1, with sufficiently quickly decaying tails. In particular, it contains the set of probability measures  $\nu \in \mathcal{P}(\mathbb{R})$  satisfying

$$\int_{-\infty}^0 F_\nu(x)^2 dx < \infty \quad \text{and} \quad \int_0^\infty (1 - F_\nu(x))^2 dx < \infty.$$

As  $\delta_0 + \mathcal{M}_0(\mathbb{R})$  is an affine translation of a Hilbert space, it inherits the inner product defined in (10) from  $\mathcal{M}_0(\mathbb{R})$ , which is now defined for differences of elements. Now consider the affine subspace consisting of measures supported on  $\{z_1, \dots, z_K\}$ . It is clear that this is a closed affine subspace (since it is finite-dimensional), and therefore there exists an orthogonal projection (with respect to the inner product defined above) onto this subspace, which we denote by  $\Pi$ . Given a probability measure  $\nu \in \delta_0 + \mathcal{M}_0(\mathbb{R})$ ,  $\Pi \nu = \sum_{i=1}^K p_i \delta_{z_i}$ , where the  $p_i$  satisfy  $\sum_{i=1}^K p_i = 1$ , and subject to this constraint, minimise  $\langle \Pi \nu - \nu, \Pi \nu - \nu \rangle_{\ell_2}$ . But note that

$$\langle \Pi \nu - \nu, \Pi \nu - \nu \rangle_{\ell_2} = \int_{\mathbb{R}} (F_{\Pi \nu}(x) - F_\nu(x))^2 dx. \quad (11)$$

By construction,  $F_{\Pi\nu}$  is constant on the open intervals  $(z_i, z_{i+1})$  for  $i = 1, \dots, K-1$ , and also on the intervals  $(-\infty, z_1)$  and  $(z_K, +\infty)$ . Therefore  $F_{\Pi\nu}$ , and hence  $\Pi\nu$  itself, is determined by the values of  $F_{\Pi\nu}(z_i)$  for  $i = 1, \dots, K$ . The optimal values (i.e. those minimising (11)) are easily verified to be:  $F_{\Pi\nu}(z_K) = 1$ , and  $F_{\Pi\nu}(z_i)$  is equal to the average of  $F_\nu$  on the interval  $(z_i, z_{i+1})$ , for  $i = 1, \dots, K-1$ . Note then that  $\Pi\nu$  is a probability distribution (since  $F_{\Pi\nu}$  is non-decreasing), and in fact matches the characterisation of  $\Pi_C\nu$  obtained in Proposition 6. Therefore we have established that  $\Pi_C$  is exactly orthogonal projection in the affine Hilbert space  $\delta_0 + \mathcal{M}_0(\mathbb{R})$ . Further, we have verified that the norm between elements in the space is exactly  $\ell_2$ , and hence it follows that  $\Pi_C$  is a non-expansion with respect to  $\ell_2$ .  $\square$

**Lemma 3** (Pythagorean theorem). *Let  $\mu \in \mathcal{P}([z_1, z_K])$ , and let  $\nu \in \mathcal{P}(\{z_1, \dots, z_K\})$ . Then*

$$\ell_2^2(\mu, \nu) = \ell_2^2(\mu, \Pi_C\mu) + \ell_2^2(\Pi_C\mu, \nu).$$

*Proof.* Denote by  $F_\mu$ ,  $F_{\Pi_C\mu}$  and  $F_\nu$  the CDFs of the measures  $\mu$ ,  $\Pi_C\mu$  and  $\nu$  respectively. Now note

$$\begin{aligned} \ell_2^2(\mu, \nu) &= \int_{z_1}^{z_K} (F_\mu(x) - F_\nu(x))^2 dx \\ &= \int_{z_1}^{z_K} (F_\mu(x) - F_{\Pi_C\mu}(x) + F_{\Pi_C\mu}(x) - F_\nu(x))^2 dx \\ &= \int_{z_1}^{z_K} (F_\mu(x) - F_{\Pi_C\mu}(x))^2 dx + \int_{z_1}^{z_K} (F_\nu(x) - F_{\Pi_C\mu}(x))^2 dx \\ &\quad - 2 \int_{z_1}^{z_K} (F_\mu(x) - F_{\Pi_C\mu}(x))(F_\nu(x) - F_{\Pi_C\mu}(x)) dx. \end{aligned}$$

Finally, observe that

$$\begin{aligned} &\int_{z_1}^{z_K} (F_\mu(x) - F_{\Pi_C\mu}(x))(F_\nu(x) - F_{\Pi_C\mu}(x)) dx \\ &= \sum_{k=1}^{K-1} (F_\nu(z_k) - F_{\Pi_C\mu}(z_k)) \int_{z_k}^{z_{k+1}} (F_\mu(x) - F_{\Pi_C\mu}(x)) dx \\ &= 0, \end{aligned}$$

since by Proposition 6,  $F_{\Pi_C\mu}$  is constant on  $(z_k, z_{k+1})$ , and is equal to the average of  $F_\mu$  on the same interval.  $\square$

**Proposition 2.** *The operator  $\Pi_C\mathcal{T}^\pi$  is a  $\sqrt{\gamma}$ -contraction in  $\bar{\ell}_2$ . Further, there is a unique distribution function  $\eta_C \in \mathcal{P}^{\mathcal{X} \times \mathcal{A}}$  such that given any initial distribution function  $\eta_0 \in \mathcal{P}(\mathbb{R})^{\mathcal{X} \times \mathcal{A}}$ , we have*

$$(\Pi_C\mathcal{T}^\pi)^m \eta_0 \rightarrow \eta_C \text{ in } \bar{\ell}_2 \text{ as } m \rightarrow \infty.$$

*Proof.* First, we show that the true distributional Bellman operator  $\mathcal{T}^\pi$  is a  $\sqrt{\gamma}$ -contraction in  $\bar{\ell}_2$ . Note that through notions of scale sensitivity, as discussed by Bellemare et al. [2017b], the ideas here may be extended to other distances over probability measures. Let  $\eta, \mu \in \mathcal{P}(\mathbb{R})^{\mathcal{X} \times \mathcal{A}}$ . Then

$$\begin{aligned} \ell_2^2((\mathcal{T}^\pi\eta)^{(x,a)}, (\mathcal{T}^\pi\mu)^{(x,a)}) &= \ell_2^2\left(\int_{\mathbb{R}} \sum_{(x',a') \in \mathcal{X} \times \mathcal{A}} \pi(a'|x') p(dr, x'|x, a) (f_{r,\gamma})_{\#} \eta^{(x',a')}, \right. \\ &\quad \left. \int_{\mathbb{R}} \sum_{(x',a') \in \mathcal{X} \times \mathcal{A}} \pi(a'|x') p(dr, x'|x, a) (f_{r,\gamma})_{\#} \mu^{(x',a')}\right) \\ &\leq \int_{\mathbb{R}} \sum_{(x',a') \in \mathcal{X} \times \mathcal{A}} \pi(a'|x') p(dr, x'|x, a) \ell_2^2((f_{r,\gamma})_{\#} \eta^{(x',a')}, (f_{r,\gamma})_{\#} \mu^{(x',a')}) \\ &= \int_{\mathbb{R}} \sum_{(x',a') \in \mathcal{X} \times \mathcal{A}} \pi(a'|x') p(dr, x'|x, a) \gamma \ell_2^2(\eta^{(x',a')}, \mu^{(x',a')}) \\ &\leq \gamma \bar{\ell}_2^2(\eta, \mu), \end{aligned}$$

with the first inequality following from Jensen's inequality, and the equality coming from the follow general fact about the Cramér distance and probability measures  $\nu_1, \nu_2 \in P(\mathbb{R})$ :

$$\begin{aligned}
 \ell_2^2((f_{r,\gamma})\#\nu_1, (f_{r,\gamma})\#\nu_2) &= \int_{\mathbb{R}} (F_{(f_{r,\gamma})\#\nu_1}(t) - F_{(f_{r,\gamma})\#\nu_2}(t))^2 dt \\
 &= \int_{\mathbb{R}} (F_{\nu_1}(f_{r,\gamma}^{-1}(t)) - F_{\nu_2}(f_{r,\gamma}^{-1}(t)))^2 dt \\
 &= \int_{\mathbb{R}} \left( F_{\nu_1}\left(\frac{t-r}{\gamma}\right) - F_{\nu_2}\left(\frac{t-r}{\gamma}\right) \right)^2 dt \\
 &= \gamma \int_{\mathbb{R}} (F_{\nu_1}(t') - F_{\nu_2}(t'))^2 dt' \\
 &= \gamma \ell_2^2(\nu_1, \nu_2).
 \end{aligned}$$

Now by Proposition 1,  $\Pi_{\mathcal{C}}$  is a non-expansion in  $\bar{\ell}_2$ . Therefore  $\Pi_{\mathcal{C}}\mathcal{T}^\pi$  is the composition of a non-expansion in  $\bar{\ell}_2$  with a  $\sqrt{\gamma}$ -contraction in  $\bar{\ell}_2$ , and is therefore itself a  $\sqrt{\gamma}$ -contraction in  $\bar{\ell}_2$ . The second claim of the proposition then follows immediately from the Banach fixed point theorem.  $\square$

**Proposition 3.** *Let  $\eta_{\mathcal{C}}$  be the limiting return distribution function of Proposition 2. If  $\eta_\pi^{(x,a)}$  is supported on  $[z_1, z_K]$  for all  $(x, a) \in \mathcal{X} \times \mathcal{A}$ , then we have:*

$$\bar{\ell}_2^2(\eta_{\mathcal{C}}, \eta_\pi) \leq \frac{1}{1-\gamma} \max_{1 \leq i < K} (z_{i+1} - z_i).$$

*Proof.* By Lemma 3, we have:

$$\begin{aligned}
 \bar{\ell}_2^2(\eta_{\mathcal{C}}, \eta_\pi) &= \sup_{(x,a) \in \mathcal{X} \times \mathcal{A}} \ell_2^2(\eta_{\mathcal{C}}^{(x,a)}, \eta_\pi^{(x,a)}) \\
 &= \sup_{(x,a) \in \mathcal{X} \times \mathcal{A}} \left[ \ell_2^2(\eta_{\mathcal{C}}^{(x,a)}, (\Pi_{\mathcal{C}}\eta_\pi)^{(x,a)}) + \ell_2^2((\Pi_{\mathcal{C}}\eta_\pi)^{(x,a)}, \eta_\pi^{(x,a)}) \right] \\
 &\leq \bar{\ell}_2^2(\eta_{\mathcal{C}}, \Pi_{\mathcal{C}}\eta_\pi) + \bar{\ell}_2^2(\Pi_{\mathcal{C}}\eta_\pi, \eta_\pi) \\
 &= \bar{\ell}_2^2(\Pi_{\mathcal{C}}\mathcal{T}^\pi \eta_{\mathcal{C}}, \Pi_{\mathcal{C}}\mathcal{T}^\pi \eta_\pi) + \bar{\ell}_2^2(\Pi_{\mathcal{C}}\eta_\pi, \eta_\pi) \\
 &\leq \gamma \bar{\ell}_2^2(\eta_{\mathcal{C}}, \eta_\pi) + \bar{\ell}_2^2(\Pi_{\mathcal{C}}\eta_\pi, \eta_\pi),
 \end{aligned} \tag{12}$$

where in the final line we have used the contractivity of  $\Pi_{\mathcal{C}}\mathcal{T}^\pi$  under  $\bar{\ell}_2$  from Proposition 2. Due to Proposition 6 (see Section 7) we have that  $F_{\Pi_{\mathcal{C}}\eta_\pi^{(x,a)}}$  is constant on the intervals  $(z_i, z_{i+1})$  for  $i = 1, \dots, K-1$ , and moreover, due to the formula for the mass placed at the locations  $z_{1:K}$ , we also have

$$F_{\Pi_{\mathcal{C}}\eta_\pi^{(x,a)}}(z_i) \in [F_{\eta_\pi^{(x,a)}}(z_i), F_{\eta_\pi^{(x,a)}}(z_{i+1})] \quad \text{for } i = 1, \dots, K-1 \quad , F_{\Pi_{\mathcal{C}}\eta_\pi^{(x,a)}}(z_K) = 1.$$

Therefore,

$$\begin{aligned}
 \ell_2^2(\Pi_{\mathcal{C}}\eta_\pi^{(x,a)}, \eta_\pi^{(x,a)}) &\leq \sum_{i=1}^{K-1} (z_{i+1} - z_i) (F_{\eta_\pi^{(x,a)}}(z_{i+1}) - F_{\eta_\pi^{(x,a)}}(z_i))^2 \\
 &\leq \left[ \sup_{1 \leq i < K} (z_{i+1} - z_i) \right] \sum_{i=1}^{K-1} (F_{\eta_\pi^{(x,a)}}(z_{i+1}) - F_{\eta_\pi^{(x,a)}}(z_i))^2 \\
 &\leq \left[ \sup_{1 \leq i < K} (z_{i+1} - z_i) \right] \left[ \sum_{i=1}^{K-1} (F_{\eta_\pi^{(x,a)}}(z_{i+1}) - F_{\eta_\pi^{(x,a)}}(z_i)) \right]^2 \\
 &\leq \sup_{1 \leq i < K} (z_{i+1} - z_i),
 \end{aligned}$$

for each  $(x, a) \in \mathcal{X} \times \mathcal{A}$ , yielding

$$\bar{\ell}_2^2(\Pi_{\mathcal{C}}\eta_\pi, \eta_\pi) \leq \sup_{1 \leq i < K} (z_{i+1} - z_i).$$

Thus, taking (12), applying the upper bound on  $\bar{\ell}_2^2(\Pi_C \eta_\pi, \eta_\pi)$  and rearranging, we obtain

$$\bar{\ell}_2^2(\eta_C, \eta_\pi) \leq \frac{1}{1-\gamma} \sup_{1 \leq i < K} (z_{i+1} - z_i).$$

□

**Proposition 4.** *Let  $\eta_C$  be the limiting return distribution function of Proposition 2. Suppose  $\eta_\pi^{(x,a)}$  is supported on an interval  $[z_1 - \delta, z_K + \delta]$  containing  $[z_1, z_K]$  for each  $(x, a) \in \mathcal{X} \times \mathcal{A}$ , and  $\eta_\pi^{(x,a)}([z_1 - \delta, z_1] \cup [z_K, z_K + \delta]) \leq q$  for some  $q \in \mathbb{R}$  and for all  $(x, a) \in \mathcal{X} \times \mathcal{A} - q$  bounds the excess mass lying outside the region  $[z_1, z_K]$ . Then we have*

$$\bar{\ell}_2^2(\eta_C, \eta_\pi) \leq \frac{1}{1-\gamma} \left( \max_{1 \leq i < K} (z_{i+1} - z_i) + 2q^2\delta \right).$$

*Proof.* The proof proceeds as for that of Proposition 3, obtaining the inequality

$$\bar{\ell}_2^2(\eta_C, \eta_\pi) \leq \frac{1}{1-\gamma} \bar{\ell}_2^2(\Pi_C \eta_\pi, \eta_\pi).$$

We now bound the right-hand side as follows:

$$\begin{aligned} \ell_2^2(\Pi_C \eta_\pi^{(x,a)}, \eta_\pi^{(x,a)}) &\leq q^2 \times (z_1 - (z_1 - \delta)) + q^2((z_K + \delta) - z_K) + \sum_{i=1}^{K-1} (z_{i+1} - z_i) (F_{\eta_\pi^{(x,a)}}(z_{i+1}) - F_{\eta_\pi^{(x,a)}}(z_i))^2 \\ &\leq 2q^2\delta + \sup_{1 \leq i < K} (z_{i+1} - z_i), \end{aligned}$$

which yields the result as required. □

**Proposition 5.** *The distributional Bellman operator  $\mathcal{T}^\pi : \mathcal{P}(\mathbb{R})^{\mathcal{X} \times \mathcal{A}} \rightarrow \mathcal{P}(\mathbb{R})^{\mathcal{X} \times \mathcal{A}}$  is a monotone map with respect to the partial ordering on  $\mathcal{P}(\mathbb{R})^{\mathcal{X} \times \mathcal{A}}$  given by element-wise stochastic dominance. Further, the Cramér projection  $\Pi_C : \mathcal{P}(\mathbb{R})^{\mathcal{X} \times \mathcal{A}} \rightarrow \mathcal{P}(\mathbb{R})^{\mathcal{X} \times \mathcal{A}}$  is a monotone map, from which it follows that the Cramér-Bellman operator  $\Pi_C \mathcal{T}^\pi$  is also monotone.*

*Proof.* Let  $\eta, \mu \in \mathcal{P}(\mathbb{R})^{\mathcal{X} \times \mathcal{A}}$ , and suppose that  $\eta \leq \mu$ . This is equivalent to  $F_{\eta^{(x,a)}} \geq F_{\mu^{(x,a)}}$  pointwise, for each  $(x, a) \in \mathcal{X} \times \mathcal{A}$ . We now compute the CDFs of  $(\mathcal{T}^\pi \eta)^{(x,a)}$  and  $(\mathcal{T}^\pi \mu)^{(x,a)}$ , for each  $(x, a) \in \mathcal{P}(\mathbb{R})^{\mathcal{X} \times \mathcal{A}}$ , and show that stochastic dominance still holds. Indeed, by conditioning on the value of the tuple  $(r, x', a')$ , we obtain, for each

$$\begin{aligned} (\mathcal{T}^\pi \eta)^{(x,a)}((-\infty, y]) &= \sum_{(x', a') \in \mathcal{X} \times \mathcal{A}} \int_{\mathbb{R}} p(dr, x' | x, a) \pi(a' | x') (f_{r, \gamma})_{\#} \eta^{(x', a')}((-\infty, y]) \\ &= \sum_{(x', a') \in \mathcal{X} \times \mathcal{A}} \int_{\mathbb{R}} p(dr, x' | x, a) \pi(a' | x') \eta^{(x', a')}((-\infty, (y-r)/\gamma]) \\ &\geq \sum_{(x', a') \in \mathcal{X} \times \mathcal{A}} \int_{\mathbb{R}} p(dr, x' | x, a) \pi(a' | x') \mu^{(x', a')}((-\infty, (y-r)/\gamma]) \\ &= \sum_{(x', a') \in \mathcal{X} \times \mathcal{A}} \int_{\mathbb{R}} p(dr, x' | x, a) \pi(a' | x') (f_{r, \gamma})_{\#} \mu^{(x', a')}((-\infty, y]) \\ &= (\mathcal{T}^\pi \mu)^{(x,a)}((-\infty, y]), \end{aligned}$$

as required, with the inequality coming from the fact that  $\mu^{(x', a')}$  stochastically dominates  $\eta^{(x', a')}$ . This concludes the proof that the distributional Bellman operator  $\mathcal{T}^\pi$  is monotone with respect to the partial order of element-wise stochastic dominance.

The monotonicity of the Cramér projection  $\Pi_C$  may be established from the expression given for the projection in Proposition 6. Suppose we have two distributions  $\nu_1, \nu_2 \in \mathcal{P}(\mathbb{R})$ , and suppose further that  $\nu_1 \leq \nu_2$ . Then

recall from Proposition 6 that we have  $F_{\Pi_C \nu_1}(w)$  and  $F_{\Pi_C \nu_2}(w)$  equal to 0 for  $w < z_1$  and equal to 1 for  $w \geq z_K$ . For  $w \in [z_i, z_{i+1})$  for some  $i \in \{1, \dots, K-1\}$ , recall again from Proposition 6 that we have

$$F_{\Pi_C \nu_j}(w) = \frac{1}{z_{i+1} - z_i} \int_{z_i}^{z_{i+1}} F_{\nu_j}(t) dt, \quad \text{for } j = 1, 2. \quad (13)$$

Since by assumption we have  $F_{\nu_1} \geq F_{\nu_2}$  pointwise, it follows from (13) that  $F_{\Pi_C \nu_1} \geq F_{\Pi_C \nu_2}$  pointwise, and therefore  $\Pi_C \nu_1 \leq \Pi_C \nu_2$ , as required.  $\square$

### 9.1 Proof of Theorem 1

**Theorem 1.** *In the context of policy evaluation for some policy  $\pi$ , suppose that:*

(i) *the stepsizes  $(\alpha_t(x, a) | t \geq 0, (x, a) \in \mathcal{X} \times \mathcal{A})$  satisfy the Robbins-Monro conditions:*

- $\sum_{t=0}^{\infty} \alpha_t(x, a) = \infty$
- $\sum_{t=0}^{\infty} \alpha_t^2(x, a) < C < \infty$

*almost surely, for all  $(x, a) \in \mathcal{X} \times \mathcal{A}$ ;*

(ii) *we have initial estimates  $\eta_0^{(x, a)}$  of the distribution of returns for each state-action pair  $(x, a) \in \mathcal{X} \times \mathcal{A}$ , each with support contained in  $[z_1, z_K]$ .*

*Then, for the updates given by Algorithm 2, in the case of evaluation of the policy  $\pi$ , we have almost sure convergence of  $\eta_t$  to  $\eta_C$  in  $\bar{\ell}_2$ , where  $\eta_C$  is the limiting return distribution function of Proposition 2. That is,*

$$\bar{\ell}_2(\eta_t, \eta_C) \rightarrow 0 \text{ as } t \rightarrow \infty \text{ almost surely.}$$

The proof structure is based on that of Theorem 2 of Tsitsiklis [1994]; our Lemmas 5 and 6 are variants of Lemmas 5 and 6 of Tsitsiklis [1994]. The high-level argument of the proof proceeds as follows.

Define:

$$\begin{aligned} U_0^{(x, a)} &= \delta_{z_K}, & L_0^{(x, a)} &= \delta_{z_1} \\ U_{k+1}^{(x, a)} &= \frac{1}{2} U_k^{(x, a)} + \frac{1}{2} (\Pi_C \mathcal{T}^\pi U_k)^{(x, a)}, & L_{k+1}^{(x, a)} &= \frac{1}{2} L_k^{(x, a)} + \frac{1}{2} (\Pi_C \mathcal{T}^\pi L_k)^{(x, a)}, \end{aligned}$$

iteratively for each  $(x, a) \in \mathcal{X} \times \mathcal{A}$ .

**Lemma 5.** *We have  $U_{k+1} \leq U_k$ , for each  $k \in \mathbb{N}_0$ , and  $L_{k+1} \geq L_k$ , for each  $k \in \mathbb{N}_0$ . Further, we have  $U_k \rightarrow \eta_C$  in  $\bar{\ell}_2$ , and also  $L_k \rightarrow \eta_C$  in  $\bar{\ell}_2$ .*

Finally, we argue that, for each  $k \in \mathbb{N}_0$ , the return distribution functions  $U_k$  and  $L_k$  sandwich all but finitely many of the return distribution estimators  $\eta_t$ , in a sense made precise by the following lemma.

**Lemma 6.** *Given  $k \in \mathbb{N}_0$ , there exists a random time  $T_k$  taking values in  $\mathbb{N}_0$  such that*

$$L_k \leq \eta_t \leq U_k \quad \text{for all } t > T_k, \text{ almost surely.}$$

Now, from Lemma 6 the conclusion of Theorem 1 is reached as follows. Let  $\varepsilon > 0$ , and pick  $k \in \mathbb{N}_0$  sufficiently large so that  $\bar{\ell}_2(L_k, \eta_C), \bar{\ell}_2(U_k, \eta_C) < \varepsilon$ , which can be done by Lemma 5. Note then by the triangle inequality that  $\bar{\ell}_2(U_k, L_k) < 2\varepsilon$ , and further, we have:

$$\bar{\ell}_2(\eta_t, \eta_C) \leq \bar{\ell}_2(\eta_t, L_k) + \bar{\ell}_2(L_k, U_k) + \bar{\ell}_2(U_k, \eta_C).$$

Since, by Lemma 6, we have that  $L_k \leq \eta_t \leq U_k$  for all  $t > T_k$  almost surely, it follows that  $\bar{\ell}_2(\eta_t, L_k) \leq \bar{\ell}_2(L_k, U_k)$  for all  $t > T_k$  almost surely, and so we obtain

$$\bar{\ell}_2(\eta_t, \eta_C) \leq 2\bar{\ell}_2(L_k, U_k) + \bar{\ell}_2(U_k, \eta_C) < 5\varepsilon \text{ for all } t > T_k \text{ almost surely,}$$

which yields the statement of Theorem 1. It now remains to establish Lemmas 5 and 6.

## 9.2 Proof of Lemma 5

We firstly show that  $U_{k+1} \leq U_k$  for each  $k \in \mathbb{N}_0$ . The proof that  $L_{k+1} \geq L_k$  for each  $k \in \mathbb{N}_0$  is entirely analogous.

First, observe that  $U_1 \leq U_0$ , since each distribution  $U_1^{(x,a)}$  is supported on  $[z_1, z_K]$ , and  $U_0^{(x,a)}$  was chosen to stochastically dominate all distributions supported on  $[z_1, z_K]$ . For the inductive step, suppose  $U_{k+1} \leq U_k$  for some  $k \in \mathbb{N}_0$ . Then by monotonicity of  $\Pi_{\mathcal{C}}\mathcal{T}^\pi$ , we have  $\Pi_{\mathcal{C}}\mathcal{T}^\pi U_{k+1} \leq \Pi_{\mathcal{C}}\mathcal{T}^\pi U_k$ . Hence,

$$U_{k+2}^{(x,a)} = \frac{1}{2}U_{k+1}^{(x,a)} + \frac{1}{2}(\Pi_{\mathcal{C}}\mathcal{T}^\pi U_{k+1})^{(x,a)} \leq \frac{1}{2}U_k^{(x,a)} + \frac{1}{2}(\Pi_{\mathcal{C}}\mathcal{T}^\pi U_k)^{(x,a)} = U_{k+1}^{(x,a)},$$

which completes the inductive proof. To establish convergence of  $U_k$  to  $\eta_{\mathcal{C}}$ , we make use of the following general result.

**Lemma 7.** *Let  $(\nu_k)_{k=0}^\infty$  be a sequence of probability measures over  $\{z_1, \dots, z_K\}$ , with the property that  $\nu_{k+1} \leq \nu_k$  for each  $k \in \mathbb{N}_0$ . Then there exists a probability measure  $\nu^*$  over  $\{z_1, \dots, z_K\}$  such that  $\nu_k \rightarrow \nu^*$  in  $\ell_2$ .*

*Proof.* We work with CDFs. Denote the CDF of  $\nu_k$  by  $F_k$ , for  $k \in \mathbb{N}_0$ . Recall that the stochastic dominance condition  $\nu_{k+1} \leq \nu_k$  implies that  $F_{k+1} \geq F_k$  pointwise. Therefore for each  $x \in \mathbb{R}$ , we have that  $(F_k(x))_{k \in \mathbb{N}_0}$  is an increasing sequence, trivially upper-bounded by 1. Therefore the sequence converges, and so there exists a limit function  $F : \mathbb{R} \rightarrow \mathbb{R}$ , defined by  $F^*(x) = \lim_{k \rightarrow \infty} F_k(x)$ . It is straightforward to see that this limit function takes values in  $[0, 1]$ , is non-decreasing, right-continuous and is constant away from the set  $\{z_1, \dots, z_K\}$ . It is therefore the CDF of a probability distribution  $\nu^*$  supported on  $\{z_1, \dots, z_K\}$ . Since  $\tilde{F}^*$  is constant away from  $\{z_1, \dots, z_K\}$ ,  $\nu^*$  is supported on  $\{z_1, \dots, z_K\}$ . To show that  $\nu_k \rightarrow \nu^*$  in  $\ell_2$ , we must establish that  $\int_{\mathbb{R}} (F_k(x) - F^*(x))^2 dx \rightarrow 0$ . Since  $\nu^* \leq \nu_{k+1} \leq \nu_k$  for each  $k \in \mathbb{N}_0$ , it follows that  $\int_{\mathbb{R}} (F_k(x) - F^*(x))^2 dx$  is a non-increasing sequence, and so it suffices to show that it is not lower-bounded by a positive number to establish the sequence's convergence to 0. To that end, let  $\varepsilon > 0$ . Pick  $k \in \mathbb{N}_0$  such that  $|F_k(z_i) - F^*(z_i)| < \varepsilon$ , for each  $i = 1, \dots, K-1$ . Then observe that

$$\int_{\mathbb{R}} (F_k(x) - F^*(x))^2 dx \leq \sum_{i=1}^{K-1} (z_{i+1} - z_i) \varepsilon^2,$$

which demonstrates that no positive lower bounded exists, as required.  $\square$

Applying Lemma 7 to each of the sequences  $(U_k^{(x,a)})_{k=0}^\infty$ , for each state-action pair  $(x, a) \in \mathcal{X} \times \mathcal{A}$ , we obtain the convergence of  $(U_k)_{k=0}^\infty$  to some set of return distributions  $\eta^*$  in  $\bar{\ell}_2$ . Finally, due to the continuity of  $\Pi_{\mathcal{C}}\mathcal{T}^\pi$  with respect to  $\bar{\ell}_2$ , this limiting set of return distributions  $\eta^*$  must satisfy  $\eta^* = \frac{1}{2}\eta^* + \frac{1}{2}\Pi_{\mathcal{C}}\mathcal{T}^\pi\eta^*$ , implying that  $\eta^* = \Pi_{\mathcal{C}}\mathcal{T}^\pi\eta^*$ , so the limiting set of return distributions is indeed the fixed point  $\eta_{\mathcal{C}}$  of  $\Pi_{\mathcal{C}}\mathcal{T}^\pi$ . Analogously, we may show that  $L_k \rightarrow \eta_{\mathcal{C}}$  in  $\bar{\ell}_2$ .

## 9.3 Proof of Lemma 6

We prove this lemma by induction. The result is clear for  $k = 0$ , as in this case  $U_0^{(x,a)}$  stochastically dominates all distributions supported on  $[z_1, z_K]$ , and  $L_0^{(x,a)}$  is stochastically dominated by all distributions supported on  $[z_1, z_K]$ . Now assume the result holds for some  $k \geq 0$ ; that is, there exists some random time  $T_k$  such that  $L_k \leq \eta_t \leq U_k$  for all  $t \geq T_k$  almost surely. Here, we follow the structure of the proof of Lemma 6 of [Tsitsiklis, 1994] closely. We will show there exists a random time  $T_{k+1}$  such that  $\eta_t \leq U_{k+1}$  for all  $t \geq T_{k+1}$  almost surely; the claim that  $L_{k+1} \leq \eta_t$  for all  $t \geq T_{k+1}$  may be proven analogously.

Now define

$$H_{T_k}^{(x,a)} = U_k^{(x,a)}, \quad H_{t+1}^{(x,a)} = (1 - \alpha_t(x, a))H_t^{(x,a)} + \alpha_t(x, a)(\Pi_{\mathcal{C}}\mathcal{T}^\pi U_k)^{(x,a)}, \quad \text{for } t \geq T_k \quad (14)$$

$$W_{T_k}^{(x,a)} = 0 \in \mathcal{M}(\mathbb{R}), \quad W_{t+1}^{(x,a)} = (1 - \alpha_t(x, a))W_t^{(x,a)} + \alpha_t(x, a) \left[ (\Pi_{\mathcal{C}}(f_{r,\gamma})_{\#}\eta_t)^{(x',a')} - (\Pi_{\mathcal{C}}\mathcal{T}^\pi\eta_t)^{(x,a)} \right], \quad \text{for } t \geq T_k,$$

where  $\mathcal{M}(\mathbb{R})$  is the space of signed measures on  $\mathbb{R}$ , and  $0 \in \mathcal{M}(\mathbb{R})$  represents the zero measure; that is, the signed measure that assigns measure 0 to every Borel subset of  $\mathbb{R}$ . Note that the process  $(W_t)_{t \geq T_k}$  takes values in the space of collections of finite signed measures indexed by state-action pairs, each with overall mass 0; that is,  $W_t^{(x,a)}(\mathbb{R}) = 0$  for all  $(x, a) \in \mathcal{X} \times \mathcal{A}$ , for all  $t \geq T_k$ .

We now argue that  $\eta_t^{(x,a)} \leq H_t^{(x,a)} + W_t^{(x,a)}$  for all  $t \geq T_k$  and for all  $(x, a) \in \mathcal{X} \times \mathcal{A}$  almost surely. For  $t = T_k$ , this following from the definitions in (14) and the dominance relation  $\eta_{T_k} \leq U_k$ . To complete the proof, we proceed inductively. Suppose that  $\eta_t^{(x,a)} \leq H_t^{(x,a)} + W_t^{(x,a)}$  for all  $(x, a) \in \mathcal{X} \times \mathcal{A}$ , for some  $t \geq T_k$ . Then note, assuming  $\alpha_t(x, a) = 0$  if the distribution corresponding to the state-action pair  $(x, a)$  is not updated at time  $t$ , we have

$$\begin{aligned} \eta_{t+1}^{(x,a)} &= (1 - \alpha_t(x, a))\eta_t^{(x,a)} + \alpha_t(x, a)\Pi_{\mathcal{C}}(f_{r,\gamma})_{\#}\eta_t^{(x',a')} \\ &= (1 - \alpha_t(x, a))\eta_t^{(x,a)} + \alpha_t(x, a)(\Pi_{\mathcal{C}}\mathcal{T}^{\pi}\eta_t)^{(x,a)} + \alpha_t(x, a)(\Pi_{\mathcal{C}}(f_{r,\gamma})_{\#}\eta_t^{(x',a')}) - (\Pi_{\mathcal{C}}\mathcal{T}^{\pi}\eta_t)^{(x,a)} \\ &\stackrel{(i)}{\leq} (1 - \alpha_t(x, a))(H_t^{(x,a)} + W_t^{(x,a)}) + \alpha_t(x, a)(\Pi_{\mathcal{C}}\mathcal{T}^{\pi}U_k)^{(x,a)} + \alpha_t(x, a)(\Pi_{\mathcal{C}}(f_{r,\gamma})_{\#}\eta_t^{(x',a')}) - (\Pi_{\mathcal{C}}\mathcal{T}^{\pi}\eta_t)^{(x,a)} \\ &= (1 - \alpha_t(x, a))H_t^{(x,a)} + \alpha_t(x, a)(\Pi_{\mathcal{C}}\mathcal{T}^{\pi}U_k)^{(x,a)} + (1 - \alpha_t(x, a))W_t^{(x,a)} \\ &\quad + \alpha_t(x, a)(\Pi_{\mathcal{C}}(f_{r,\gamma})_{\#}\eta_t^{(x',a')}) - (\Pi_{\mathcal{C}}\mathcal{T}^{\pi}\eta_t)^{(x,a)} \\ &= H_{t+1}^{(x,a)} + W_{t+1}^{(x,a)}, \end{aligned}$$

as required. In the above derivation, (i) comes from the stochastic dominance relations  $\eta_t \leq H_t + W_t$  (by induction hypothesis) and  $\eta_t \leq U_k$  and the monotonicity of  $\Pi_{\mathcal{C}}\mathcal{T}^{\pi}$ . Note that we have the following expression for  $H_t^{(x,a)}$ :

$$H_t^{(x,a)} = \left( \prod_{\tau=T_k}^{t-1} (1 - \alpha_{\tau}(x, a)) \right) U_k + \left( 1 - \prod_{\tau=T_k}^{t-1} (1 - \alpha_{\tau}(x, a)) \right) (\Pi_{\mathcal{C}}\mathcal{T}^{\pi}U_k)^{(x,a)}$$

Since by assumption we have  $\sum_{k=0}^{\infty} \alpha_k(x, a) = \infty$  for all  $(x, a) \in \mathcal{X} \times \mathcal{A}$  almost surely, we have that there exists a random time  $\tilde{T}_{k+1}$  such that  $\prod_{\tau=T_k}^{t-1} (1 - \alpha_{\tau}(x, a)) \leq 1/4$  for all  $(x, a) \in \mathcal{X} \times \mathcal{A}$ , and for all  $t \geq \tilde{T}_{k+1}$  almost surely. Since  $\Pi_{\mathcal{C}}\mathcal{T}^{\pi}U_k \leq U_k$ , for all  $t \geq \tilde{T}_k$ , we have:

$$\begin{aligned} \eta_t &\leq H_t + W_t \\ &\leq \frac{1}{4}U_k + \frac{3}{4}\Pi_{\mathcal{C}}\mathcal{T}^{\pi}U_k + W_t \\ &= \frac{1}{2}U_k + \frac{1}{2}\Pi_{\mathcal{C}}\mathcal{T}^{\pi}U_k + W_t - \frac{1}{4}(U_k - \Pi_{\mathcal{C}}\mathcal{T}^{\pi}U_k) \\ &= U_{k+1} + W_t - \frac{1}{4}(U_k - \Pi_{\mathcal{C}}\mathcal{T}^{\pi}U_k). \end{aligned} \tag{15}$$

Now note that if  $U_k^{(x,a)}((-\infty, z_i]) = \Pi_{\mathcal{C}}\mathcal{T}^{\pi}U_k^{(x,a)}((-\infty, z_i])$ , then we have  $U_{k+1}^{(x,a)}((-\infty, z_i]) = U_k^{(x,a)}((-\infty, z_i])$ . Let  $\delta$ , then, be the smallest non-zero value of  $|(\Pi_{\mathcal{C}}\mathcal{T}^{\pi}U_k)^{(x,a)}((-\infty, z_i]) - U_k^{(x,a)}((-\infty, z_i])|$  across all state-action pairs  $(x, a) \in \mathcal{X} \times \mathcal{A}$  and all support points  $z_i \in \{z_1, \dots, z_K\}$ . Crucially, we observe that the additive ‘‘noise’’ term appearing in the definition of  $W_{t+1}^{(x,a)}$  in Equation (14) is mean-zero, in the following sense: as a random measure, the expectation of the noise term is the 0 measure. More concretely for our purposes, we have, as stated in Lemma 4 in the main paper, for all  $z_i \in \{z_1, \dots, z_K\}$ :

$$\mathbb{E}_{r,x',a'} \left[ \left( (\Pi_{\mathcal{C}}(f_{r,\gamma})_{\#}\eta_t)^{(x',a')} - (\Pi_{\mathcal{C}}\mathcal{T}^{\pi}\eta_t)^{(x,a)} \right) \right] ((-\infty, z_i]) = 0.$$

Standard stochastic approximation theory (e.g. [Tsitsiklis, 1994]), via Assumption (i), then yields that  $W_t^{(x,a)}((-\infty, z_i]) \rightarrow 0$  almost surely, for all  $(x, a) \in \mathcal{X} \times \mathcal{A}$ , and for all  $z_i \in \{z_1, \dots, z_K\}$ . We can now take  $T_{k+1} > \tilde{T}_{k+1}$  sufficiently large so that  $|W_t^{(x,a)}((-\infty, z_i])| < \delta/4$  for all  $t \geq T_{k+1}$  and all  $(x, a) \in \mathcal{X} \times \mathcal{A}$ . Then (15) yields that  $\eta_t \leq U_{k+1}$  for all  $t \geq T_{k+1}$ , completing the inductive step, and therefore completing the proof of Lemma 6.

## 9.4 Proof of Theorem 2

**Theorem 2.** *Suppose that Assumptions (i)–(ii) of Theorem 1 hold, and that all unprojected target distributions  $\hat{\eta}_*^{(x_t, a_t)}$  arising in Algorithm 2 are supported within  $[z_1, z_K]$  almost surely. Assume further that there is a unique optimal policy  $\pi^*$  for the MDP. Then, for the updates given in Algorithm 2, in the case of control, we have almost sure convergence of  $(\eta_t^{(x,a)})_{(x,a) \in \mathcal{X} \times \mathcal{A}}$  in  $\bar{\ell}_2$  to some limit  $\eta_C^*$ , and furthermore the greedy policy with respect to  $\eta_C^*$  is the optimal policy  $\pi^*$ .*



*Proof.* We first note that the updates induced by the algorithm on the *expected returns* are exactly those of standard (non-distributional) Q-learning. More precisely, denoting the expected returns  $\mathbb{E}_{R \sim \eta_t^{(x,a)}}[R]$  at state-action pair  $(x, a) \in \mathcal{X} \times \mathcal{A}$  at time  $t$  by  $Q_t(x, a)$ , we have that these Q-values follow the standard dynamics of Q-learning. This holds because the maximum and minimum possible estimated rewards lie within the support of the parametrised distributions, by the assumptions of the theorem. We may therefore apply the non-distributional theory [Tsitsiklis, 1994] to argue that the expectations  $(Q_t(x, a)|(x, a) \in \mathcal{X} \times \mathcal{A})$  converge almost-surely to the true optimal expected returns  $(Q^{\pi^*}(x, a)|(x, a) \in \mathcal{X} \times \mathcal{A})$ . Since the state space and action space are finite, this convergence is almost-surely uniform across all state-action pairs. Therefore, given  $\varepsilon > 0$ , there exists a random variable  $N$  such that for  $t > N$ , we have

$$\sup_{(x,a) \in \mathcal{X} \times \mathcal{A}} |Q_t(x, a) - Q^{\pi^*}(x, a)| < \varepsilon \quad \text{almost surely.}$$

Now take  $\varepsilon$  to be equal to half the minimum action gap across all states for the optimal action-value function  $Q^{\pi^*}$ ; that is, take  $\varepsilon = \frac{1}{2} \min_{x \in \mathcal{X}} [Q^{\pi^*}(x, \pi^*(x)) - \max_{a \neq \pi^*(x)} Q^{\pi^*}(x, a)]$  (which is greater than zero by the assumption of a unique optimal policy and finite state and action spaces). Then for  $t > N$ , the Q-learning updates are exactly the same as policy evaluation updates for the optimal policy  $\pi^*$ . Under these updates, we proved in Theorem 1 that the return distributions converge to the approximate return distribution function  $\eta_{\mathcal{C}}$ . Note however, that  $N$  is not a stopping time; we must be particularly careful with the analysis that follows.

We therefore proceed according to a coupling argument. We define the following set of independent stochastic distributional Bellman operators:  $(\widehat{T}_t^\pi)$  across all deterministic policies  $\pi$ , and timesteps  $t \in \mathbb{N}$ . The idea is to define a  $\pi^*$  categorical policy evaluation algorithm with these operators, and also a categorical Q-learning algorithm, and couple these processes together with probability tending to 1 as the number of steps of each algorithm increases. Since the return distribution ensemble computed by the policy evaluation algorithm will converge to the approximate return distribution function  $\eta_{\mathcal{C}}$  associated with  $\pi^*$  almost surely, we will then be able to argue that the same is true of the distributions computed by the Q-learning algorithm.

More precisely, we first construct the  $\pi^*$  categorical policy evaluation algorithm by taking an initial return distribution function  $(\eta_0^{(x,a)}|(x, a) \in \mathcal{X} \times \mathcal{A})$ , and defining:

$$\eta_{k+1} = \Pi_{\mathcal{C}} \widehat{T}_k^{\pi^*} \eta_k,$$

for each  $k \geq 0$ . We construct the Q-learning algorithm by taking the same initial return distribution function  $(\eta_0^{(x,a)}|(x, a) \in \mathcal{X} \times \mathcal{A})$ , and defining the following updates, letting  $\tilde{\eta}_0 = \eta_0$ :

$$\begin{aligned} \text{Let } \pi_k \text{ be greedy wrt } \tilde{\eta}_k, \\ \tilde{\eta}_{k+1} = \Pi_{\mathcal{C}} \widehat{T}_k^{\pi_k} \tilde{\eta}_k, \end{aligned}$$

for each  $k \geq 0$ .

By the remarks above, we have  $\pi_k = \pi^*$  for all  $k$  sufficiently large almost surely. Let  $A_k = \{\pi_l = \pi^* \text{ for all } l \geq k\}$ , for each  $k \in \mathbb{N}$ . Then  $A_k \subseteq A_{k+1}$ , and  $\mathbb{P}(A_k) \uparrow 1$ . Let  $B$  be the event of probability 1 for which the policy evaluation algorithm converges. Now, on the event  $B \cap A_k$ , we have

$$\bar{\ell}_2^2(\eta_l, \eta_{\mathcal{C}}) \rightarrow 0,$$

where  $\eta_{\mathcal{C}}$  is the limiting distribution function for the policy  $\pi^*$ , as in Theorem 1. Note then that if  $\bar{\ell}_2^2(\tilde{\eta}_l, \eta_l) \rightarrow 0$  on this event too, then by the triangle inequality, we have  $\bar{\ell}_2^2(\tilde{\eta}_l, \eta_{\mathcal{C}}) \rightarrow 0$ , and hence Q-learning converges on  $A_k \cap B$ , and since  $\mathbb{P}(A_k \cap B) \uparrow 1$ , the statement of the theorem immediately follows. We first observe that

$\bar{\ell}_2^2(\tilde{\eta}_l, \eta_l)$ , for  $l \geq k$ , is eventually a non-increasing positive sequence on the event  $A_k$ :

$$\begin{aligned}
 & \ell_2^2(\tilde{\eta}_{l+1}^{(x,a)}, \eta_{l+1}^{(x,a)}) \\
 &= \left\| \left( (1 - \alpha_l(x, a)) \tilde{\eta}_l^{(x,a)} + \alpha_l(x, a) (\Pi_C \widehat{\mathcal{T}}_l^{\pi^*} \tilde{\eta}_l)^{(x,a)} \right) - \left( (1 - \alpha_l(x, a)) \eta_l^{(x,a)} + \alpha_l(x, a) (\Pi_C \widehat{\mathcal{T}}_l^{\pi^*} \eta_l)^{(x,a)} \right) \right\|_{\ell_2}^2 \\
 &= (1 - \alpha_l(x, a))^2 \left\| \tilde{\eta}_l^{(x,a)} - \eta_l^{(x,a)} \right\|_{\ell_2}^2 + \alpha_l(x, a)^2 \left\| (\Pi_C \widehat{\mathcal{T}}_l^{\pi^*} \tilde{\eta}_l)^{(x,a)} - (\Pi_C \widehat{\mathcal{T}}_l^{\pi^*} \eta_l)^{(x,a)} \right\|_{\ell_2}^2 \\
 &\quad + 2\alpha_l(x, a)(1 - \alpha_l(x, a)) \langle \tilde{\eta}_l^{(x,a)} - \eta_l^{(x,a)}, (\Pi_C \widehat{\mathcal{T}}_l^{\pi^*} \tilde{\eta}_l)^{(x,a)} - (\Pi_C \widehat{\mathcal{T}}_l^{\pi^*} \eta_l)^{(x,a)} \rangle_{\ell_2} \\
 &\leq (1 - \alpha_l(x, a))^2 \bar{\ell}_2^2(\tilde{\eta}_l, \eta_l) + \alpha_l(x, a)^2 \gamma \bar{\ell}_2^2(\tilde{\eta}_l, \eta_l) + 2\alpha_l(x, a)(1 - \alpha_l(x, a)) \sqrt{\gamma} \bar{\ell}_2^2(\tilde{\eta}_l, \eta_l) \\
 &= (1 - \alpha_l(x, a)(1 - \sqrt{\gamma}))^2 \bar{\ell}_2^2(\tilde{\eta}_l, \eta_l). \tag{16}
 \end{aligned}$$

Therefore, on this event,  $\bar{\ell}_2(\tilde{\eta}_l, \eta_l)$  has a limit almost surely. Denote  $Z$  as the limit of the sequence, and on the event that  $Z > 0$ , pick  $\delta > 0$  such that  $\sqrt{\gamma}(Z + \delta) < Z$ . Letting  $\tau > 0$  such that  $\bar{\ell}_2(\tilde{\eta}_l, \eta_l) < Z + \delta$  for all  $l \geq \tau$ , we observe that for  $l \geq \tau$ , following the calculations in Equation (16), we obtain the inequality

$$\begin{aligned}
 \ell_2^2(\tilde{\eta}_{l+1}^{(x,a)}, \eta_{l+1}^{(x,a)}) &\leq (1 - \alpha_l(x, a))^2 \ell_2^2(\tilde{\eta}_l^{(x,a)}, \eta_l^{(x,a)}) + \alpha_l(x, a)^2 \gamma (Z + \delta) + 2\alpha_l(x, a)(1 - \alpha_l(x, a)) \sqrt{\gamma} (Z + \delta) \\
 &\leq (1 - 2\alpha_l(x, a) + \alpha_l(x, a)^2) \ell_2^2(\tilde{\eta}_l^{(x,a)}, \eta_l^{(x,a)}) + (2\alpha_l(x, a) - \alpha_l(x, a)^2) \sqrt{\gamma} (Z + \delta).
 \end{aligned}$$

By Assumption (i) of the theorem, we have  $\limsup_l \ell_2(\tilde{\eta}_l^{(x,a)}, \eta_l^{(x,a)}) \leq \sqrt{\gamma}(Z + \delta) < Z$  for all  $(x, a) \in \mathcal{X} \times \mathcal{A}$ , a contradiction. Therefore  $\bar{\ell}_2^2(\tilde{\eta}_l, \eta_l) \rightarrow 0$  holds on  $A_k \cap B$  almost surely, as required.  $\square$
